# Supplementary material for: Measuring Nepotism through Shared Last Names: Are We Really Moving from Opinions to Facts?
Source: PubMed Central journal article supplement (PMC3427342; doi:10.1371/journal.pone.0043574), 2012-08-24
Supplement: pone.0043574.s002.pdf [file pone.0043574.s002.pdf]

Table S1. Units of Assessment (disciplines) as defined for the 2008 Research Assessment Exercise in the United Kingdom.

| <b>Unit of Assessment and description</b>                   | <b>Unit of Assessment and description</b>                         |
|-------------------------------------------------------------|-------------------------------------------------------------------|
| 1. Cardiovascular Medicine                                  | 35. Accounting and Finance                                        |
| 2. Cancer Studies                                           | 36. Business and Management Studies                               |
| 3. Infection and Immunology                                 | 37. Library and Information Management                            |
| 4. Other Hospital Based Clinical Subjects                   | 38. Law                                                           |
| 5. Other Laboratory Based Clinical Subjects                 | 39. Politics and International Studies                            |
| 6. Epidemiology and Public Health                           | 40. Social Work and Social Policy & Administration                |
| 7. Health Services Research                                 | 41. Sociology                                                     |
| 8. Primary Care and Other Community Based Clinical Subjects | 42. Anthropology                                                  |
| 9. Psychiatry, Neuroscience and Clinical Psychology         | 43. Development Studies                                           |
| 10. Dentistry                                               | 44. Psychology                                                    |
| 11. Nursing and Midwifery                                   | 45. Education                                                     |
| 12. Allied Health Professions and Studies                   | 46. Sports-Related Studies                                        |
| 13. Pharmacy                                                | 47. American Studies and Anglophone Area Studies                  |
| 14. Biological Sciences                                     | 48. Middle Eastern and African Studies                            |
| 15. Pre-clinical and Human Biological Sciences              | 49. Asian Studies                                                 |
| 16. Agriculture, Veterinary and Food Science                | 50. European Studies                                              |
| 17. Earth Systems and Environmental Sciences                | 51. Russian, Slavonic and East European Languages                 |
| 18. Chemistry                                               | 52. French                                                        |
| 19. Physics                                                 | 53. German, Dutch and Scandinavian Languages                      |
| 20. Pure Mathematics                                        | 54. Italian                                                       |
| 21. Applied Mathematics                                     | 55. Iberian and Latin American Languages                          |
| 22. Statistics and Operational Research                     | 56. Celtic Studies                                                |
| 23. Computer Science and Informatics                        | 57. English Language and Literature                               |
| 24. Electrical and Electronic Engineering                   | 58. Linguistics                                                   |
| 25. General Engineering and Mineral & Mining Engineering    | 59. Classics, Ancient History, Byzantine and Modern Greek Studies |
| 26. Chemical Engineering                                    | 60. Philosophy                                                    |
| 27. Civil Engineering                                       | 61. Theology, Divinity and Religious Studies                      |
| 28. Mechanical, Aeronautical and Manufacturing Engineering  | 62. History                                                       |
| 29. Metallurgy and Materials                                | 63. Art and Design                                                |
| 30. Architecture and the Built Environment                  | 64. History of Art, Architecture and Design                       |
| 31. Town and Country Planning                               | 65. Drama, Dance and Performing Arts                              |
| 32. Geography and Environmental Studies                     | 66. Communication, Cultural and Media Studies                     |
| 33. Archaeology                                             | 67. Music                                                         |
| 34. Economics and Econometrics                              |                                                                   |
