# Supplementary material for: Measuring Nepotism through Shared Last Names: Are We Really Moving from Opinions to Facts?
Source: PubMed Central journal article supplement (PMC3427342; doi:10.1371/journal.pone.0043574), 2012-08-24
Supplement: pone.0043574.s003.pdf [file pone.0043574.s003.pdf]

Table S2. Macro-sectors (disciplines) as defined by the Italian Ministry of University, and the correspondent Units of Assessment as defined for the 2008 Research Assessment Exercise in the United Kingdom.

| <b>Discipline</b>                                                  | <b>Macro-sector acronym (Italy)</b> | <b>Unit of Assessment (UK)</b> |
|--------------------------------------------------------------------|-------------------------------------|--------------------------------|
| Agriculture                                                        | AGR                                 | 16                             |
| American, Middle Eastern, African, Asian, European, Celtic Studies |                                     | 47 to 50, 56                   |
| Archeology                                                         | L-ANT                               | 33                             |
| Architecture                                                       |                                     | 30, 31                         |
| Art history                                                        | L-ART                               | 63 to 67                       |
| Business and management studies                                    |                                     | 36                             |
| Chemistry                                                          | CHIM                                | 18                             |
| Civil engineering                                                  | ICAR                                | 27                             |
| Classics, ancient history, Byzantine and modern Greek studies      |                                     | 59                             |
| Demography & ethnology                                             | M-DEA                               | 42                             |
| Earth sciences                                                     | GEO                                 | 17                             |
| Economics                                                          | SECS-P                              | 34, 35                         |
| Electronic engineering                                             | ING-INF                             | 24                             |
| English language and literature                                    |                                     | 57                             |
| Geography                                                          | M-GGR                               | 32                             |
| History                                                            | M-STO                               | 62                             |
| Industrial engineering                                             | ING-IND                             | 25, 26, 28, 29                 |
| Informatics                                                        | INF                                 | 23                             |
| Law                                                                | IUS                                 | 38                             |
| Library and information management                                 |                                     | 37                             |
| Life sciences                                                      | BIO                                 | 14,15                          |
| Linguistics                                                        | L-LIN                               | 58                             |
| Mathematics                                                        | MAT                                 | 20, 21                         |
| Medical sciences                                                   | MED                                 | 1 to 12                        |
| Near eastern studies                                               | L-OR                                |                                |
| Pedagogy                                                           | M-PED                               | 45                             |
| Pharmacy                                                           |                                     | 13                             |
| Philology                                                          | L-FIL-LET                           | 51 to 56                       |
| Philosophy                                                         | M-FIL                               | 60, 61                         |
| Physical education                                                 | M-EDF                               | 46                             |
| Physics                                                            | FIS                                 | 19                             |
| Political sciences                                                 | SPS                                 | 39 to 41, 43                   |
| Psychology                                                         | M-PSI                               | 44                             |
| Statistics                                                         | SECS-S                              | 22                             |
| Veterinary                                                         | VET                                 |                                |
